# Supplementary material for: An intensity-based post-processing tool for 3D instance segmentation of organelles in soft X-ray tomograms
Source: PubMed Central journal article supplement (PMC9436087; doi:10.1371/journal.pone.0269887), 2022-09-01
Supplement: pone.0269887.s003.pdf [file pone.0269887.s003.pdf]

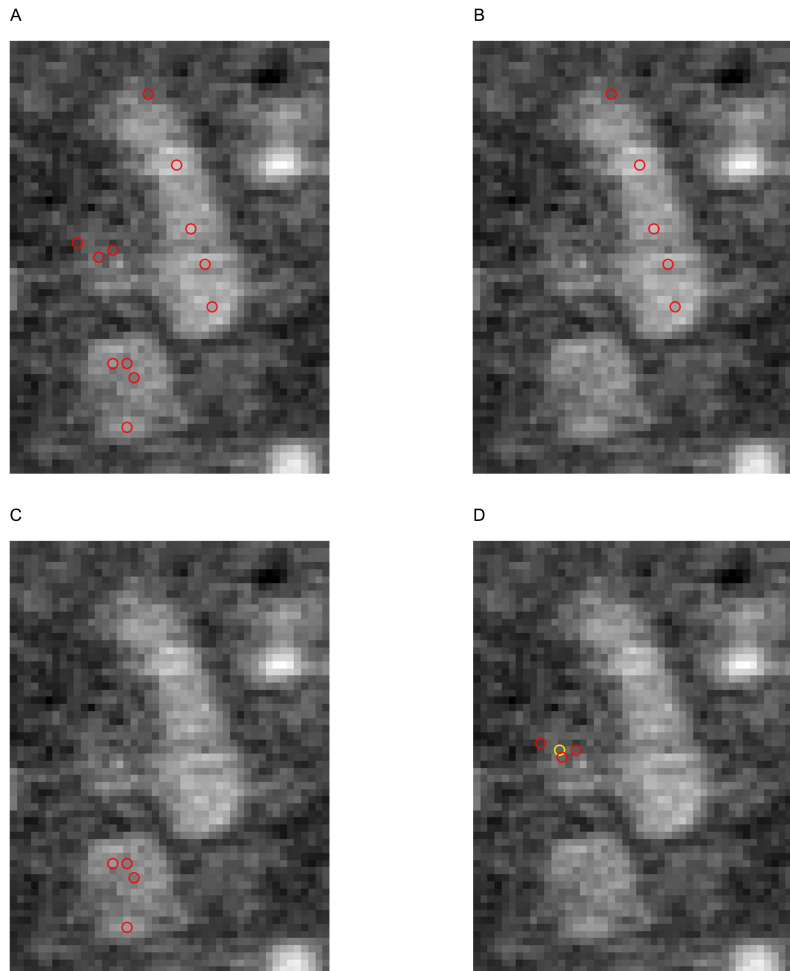

**S3 Fig An example tomogram of a cluster of mitochondria.** An example tomogram from  $\beta$ -cell dataset 822.4 shows a cluster of mitochondria with all blobs. A-D show the same slice of the 3D example tomogram. Each red circle is a 2D projection of the corresponding blob center from 3D spaces. A) Overview of all blobs on the mitochondrion cluster. B) One mitochondria instance label with five blobs generated from step 7 and step 8. C) Another mitochondria instance label with four blobs generated from step 7 and step 8. D) Last mitochondria instance label generated by K-Means clustering in step 9. The yellow circle represents the center of K-Means clustering for the three blobs. White in tomograms represents voxels with high intensity, while black represents background.
