# Supplementary material for: An intensity-based post-processing tool for 3D instance segmentation of organelles in soft X-ray tomograms
Source: PubMed Central journal article supplement (PMC9436087; doi:10.1371/journal.pone.0269887), 2022-09-01
Supplement: pone.0269887.s004.pdf [file pone.0269887.s004.pdf]

**S1 Table Comparison of intensity and volume of insulin vesicle and mitochondria instances from four mentioned methods in example datasets.**

| Organelle                | Data type | Method                     | Mean     | Standard deviation (SD) |
|--------------------------|-----------|----------------------------|----------|-------------------------|
| Insulin vesicle instance | Intensity | Post-processing tool       | 0.409    | 0.025                   |
|                          |           | Connected region labelling | 0.410    | 0.024                   |
|                          |           | Watershed                  | 0.398    | 0.032                   |
|                          |           | Watershed + Gaussian filer | 0.400    | 0.025                   |
|                          | Volume    | Post-processing tool       | 190.593  | 166.759                 |
|                          |           | Connected region labelling | 251.648  | 336.470                 |
|                          |           | Watershed                  | 27.995   | 82.429                  |
|                          |           | Watershed + Gaussian filer | 42.395   | 151.879                 |
| Mitochondria instance    | Intensity | Post-processing tool       | 0.317    | 0.015                   |
|                          |           | Connected region labelling | 0.320    | 0.016                   |
|                          |           | Watershed                  | 0.305    | 0.017                   |
|                          |           | Watershed + Gaussian filer | 0.304    | 0.019                   |
|                          | Volume    | Post-processing tool       | 1353.319 | 2304.194                |
|                          |           | Connected region labelling | 1802.903 | 5653.956                |
|                          |           | Watershed                  | 50.650   | 330.936                 |
|                          |           | Watershed + Gaussian filer | 443.766  | 2307.269                |

Dataset 769\_5 for insulin vesicle and 783\_5 for mitochondria results.
