# Supplementary material for: An intensity-based post-processing tool for 3D instance segmentation of organelles in soft X-ray tomograms
Source: PubMed Central journal article supplement (PMC9436087; doi:10.1371/journal.pone.0269887), 2022-09-01
Supplement: pone.0269887.s005.pdf [file pone.0269887.s005.pdf]

**S2 Table Comparison of intensity and volume of insulin vesicle and mitochondria instances in three conditions.**

| Organelle                | Data type  | Condition                  | Mean  | Standard error (SE) |
|--------------------------|------------|----------------------------|-------|---------------------|
| Insulin vesicle instance | Intensity  | 0 mM glucose               | 0.368 | 0.016               |
|                          |            | 25 mM glucose              | 0.389 | 0.011               |
|                          |            | 25 mM glucose + 10 nM Ex-4 | 0.421 | 0.014               |
|                          | ln(volume) | 0 mM glucose               | 4.957 | 0.343               |
|                          |            | 25 mM glucose              | 4.702 | 0.315               |
|                          |            | 25 mM glucose + 10 nM Ex-4 | 4.771 | 0.354               |
| Mitochondria instance    | Intensity  | 0 mM glucose               | 0.323 | 0.008               |
|                          |            | 25 mM glucose              | 0.326 | 0.006               |
|                          |            | 25 mM glucose + 10 nM Ex-4 | 0.353 | 0.010               |
|                          | ln(volume) | 0 mM glucose               | 6.645 | 0.536               |
|                          |            | 25 mM glucose              | 6.865 | 0.525               |
|                          |            | 25 mM glucose + 10 nM Ex-4 | 6.918 | 0.537               |
