# Supplementary material for: An intensity-based post-processing tool for 3D instance segmentation of organelles in soft X-ray tomograms
Source: PubMed Central journal article supplement (PMC9436087; doi:10.1371/journal.pone.0269887), 2022-09-01
Supplement: pone.0269887.s006.pdf [file pone.0269887.s006.pdf]

**S3 Table Intensity, volume and instance number of insulin vesicle and mitochondria instance from all datasets.**

| dataset index | condition                     | insulin vesicle instance |                       |        | mitochondria instance |                          |        |
|---------------|-------------------------------|--------------------------|-----------------------|--------|-----------------------|--------------------------|--------|
|               |                               | intensity                | volume (voxel)        | number | intensity             | volume (voxel)           | number |
|               |                               | Mean $\pm$ SD            | Mean $\pm$ SD         |        | Mean $\pm$ SD         | Mean $\pm$ SD            |        |
| 783.5         | 0 mM glucose                  | 0.366 $\pm$ 0.017        | 198.788 $\pm$ 220.883 | 424    | 0.317 $\pm$ 0.015     | 1353.319 $\pm$ 2304.194  | 329    |
| 783.11        |                               | 0.427 $\pm$ 0.032        | 458.053 $\pm$ 363.230 | 246    | 0.338 $\pm$ 0.014     | 1993.366 $\pm$ 6177.615  | 235    |
| 783.12        |                               | 0.339 $\pm$ 0.040        | 189.587 $\pm$ 160.486 | 419    | 0.303 $\pm$ 0.010     | 3614.815 $\pm$ 10641.954 | 233    |
| 784.4         |                               | 0.410 $\pm$ 0.040        | 245.661 $\pm$ 219.266 | 519    | 0.356 $\pm$ 0.010     | 3325.519 $\pm$ 15752.424 | 212    |
| 784.5         |                               | 0.361 $\pm$ 0.025        | 88.133 $\pm$ 94.789   | 330    | 0.343 $\pm$ 0.010     | 1448.872 $\pm$ 3280.561  | 235    |
| 784.6         |                               | 0.349 $\pm$ 0.027        | 128.731 $\pm$ 95.413  | 201    | 0.317 $\pm$ 0.014     | 2066.881 $\pm$ 7869.161  | 396    |
| 784.7         |                               | 0.335 $\pm$ 0.022        | 235.514 $\pm$ 208.655 | 321    | 0.307 $\pm$ 0.013     | 1636.410 $\pm$ 3293.909  | 310    |
| 785.7         |                               | 0.355 $\pm$ 0.024        | 190.442 $\pm$ 165.586 | 400    | 0.320 $\pm$ 0.014     | 1928.132 $\pm$ 6617.971  | 468    |
| 766.2         | 25 mM glucose                 | 0.392 $\pm$ 0.028        | 182.439 $\pm$ 176.529 | 652    | 0.348 $\pm$ 0.012     | 1522.861 $\pm$ 2749.621  | 252    |
| 766.5         |                               | 0.407 $\pm$ 0.020        | 172.650 $\pm$ 163.104 | 1127   | 0.327 $\pm$ 0.01      | 2920.504 $\pm$ 9277.321  | 260    |
| 766.7         |                               | 0.392 $\pm$ 0.024        | 118.058 $\pm$ 110.957 | 640    | 0.320 $\pm$ 0.014     | 2261.959 $\pm$ 3435.018  | 244    |
| 766.8         |                               | 0.355 $\pm$ 0.031        | 167.971 $\pm$ 199.826 | 943    | 0.301 $\pm$ 0.011     | 4338.274 $\pm$ 11320.585 | 241    |
| 766.10        |                               | 0.393 $\pm$ 0.020        | 176.732 $\pm$ 157.087 | 1153   | 0.330 $\pm$ 0.014     | 1915.149 $\pm$ 6934.459  | 484    |
| 766.11        |                               | 0.376 $\pm$ 0.022        | 115.605 $\pm$ 101.687 | 1337   | 0.321 $\pm$ 0.013     | 1912.473 $\pm$ 3276.707  | 421    |
| 769.5         |                               | 0.409 $\pm$ 0.025        | 190.593 $\pm$ 166.759 | 945    | 0.332 $\pm$ 0.012     | 2133.130 $\pm$ 6576.227  | 262    |
| 769.7         |                               | 0.397 $\pm$ 0.018        | 123.969 $\pm$ 114.712 | 830    | 0.327 $\pm$ 0.008     | 5053.737 $\pm$ 15091.523 | 205    |
| 822.4         | 25 mM glucose<br>+ 10 nM Ex-4 | 0.437 $\pm$ 0.021        | 244.278 $\pm$ 218.582 | 900    | 0.368 $\pm$ 0.017     | 3028.817 $\pm$ 8864.580  | 327    |
| 822.6         |                               | 0.447 $\pm$ 0.024        | 199.617 $\pm$ 158.984 | 674    | 0.365 $\pm$ 0.018     | 2111.572 $\pm$ 2412.439  | 360    |
| 822.7         |                               | 0.422 $\pm$ 0.032        | 149.896 $\pm$ 153.057 | 797    | 0.360 $\pm$ 0.019     | 2386.053 $\pm$ 4019.660  | 378    |
| 842.12        |                               | 0.349 $\pm$ 0.017        | 146.882 $\pm$ 175.937 | 516    | 0.304 $\pm$ 0.014     | 5376.675 $\pm$ 24874.676 | 163    |
| 842.13        |                               | 0.400 $\pm$ 0.025        | 270.933 $\pm$ 227.049 | 418    | 0.326 $\pm$ 0.013     | 2425.066 $\pm$ 7948.511  | 256    |
| 842.17        |                               | 0.414 $\pm$ 0.022        | 219.955 $\pm$ 197.866 | 379    | 0.323 $\pm$ 0.016     | 3875.055 $\pm$ 15028.223 | 237    |
| 931.9         |                               | 0.436 $\pm$ 0.027        | 108.525 $\pm$ 110.226 | 413    | 0.377 $\pm$ 0.016     | 2520.682 $\pm$ 5733.090  | 236    |
| 931.14        |                               | 0.438 $\pm$ 0.027        | 91.663 $\pm$ 141.772  | 570    | 0.374 $\pm$ 0.014     | 2805.640 $\pm$ 9085.129  | 261    |

SD: standard deviation.
